# Supplementary material for: PERK silence inhibits glioma cell growth under low glucose stress by blockage of p-AKT and subsequent HK2's mitochondria translocation
Source: PubMed Central journal article supplement (PMC4356960; doi:10.1038/srep09065), 2015-03-12
Supplement: srep09065-s1.pdf [file srep09065-s1.pdf]

## Supplementary information

### **PERK silence inhibits glioma cell growth under low glucose stress by blockage of p-AKT and subsequent HK2's mitochondria translocation**

Xu Hou<sup>1\*</sup>, Yaohua Liu<sup>1\*</sup>, Huailei Liu<sup>1</sup>, Xin Chen<sup>1</sup>, Min Liu<sup>2</sup>, Hui Che<sup>3</sup>, Fei Guo<sup>3</sup>, Chunlei Wang<sup>1</sup>, Daming Zhang<sup>1</sup>, Jianing Wu<sup>1</sup>, Xiaofeng Chen<sup>1</sup>, Chen Shen<sup>1</sup>, Chenguang Li<sup>1</sup>, Fei Peng<sup>1</sup>, Yunke Bi<sup>1</sup>, Zhuowen Yang<sup>4</sup>, Guang Yang<sup>1</sup>, Jing Ai<sup>3</sup>, Xin Gao<sup>5</sup>, Shiguang Zhao<sup>1</sup>

\*Those authors contributed equally to this work.

<sup>1</sup>Department of Neurosurgery, First Affiliated Hospital of Harbin Medical University, Harbin, Heilongjiang Province, People's Republic of China.

<sup>2</sup>College of Basic Medicine, Beijing University of Chinese Medicine, Beijing, People's Republic of China.

<sup>3</sup>Department of Pharmacology (State-Province Key Laboratories of Biomedicine-Pharmaceutics of China), Harbin Medical University, Harbin, Heilongjiang Province, People's Republic of China.

<sup>4</sup>Department of Endocrinology, First Affiliated Hospital of Harbin Medical University, Harbin, Heilongjiang Province, People's Republic of China.

<sup>5</sup>Computer, Electrical and Mathematical Sciences and Engineering Division, King Abdullah University of Science and Technology (KAUST), Thuwal, Kingdom of Saudi Arabia.

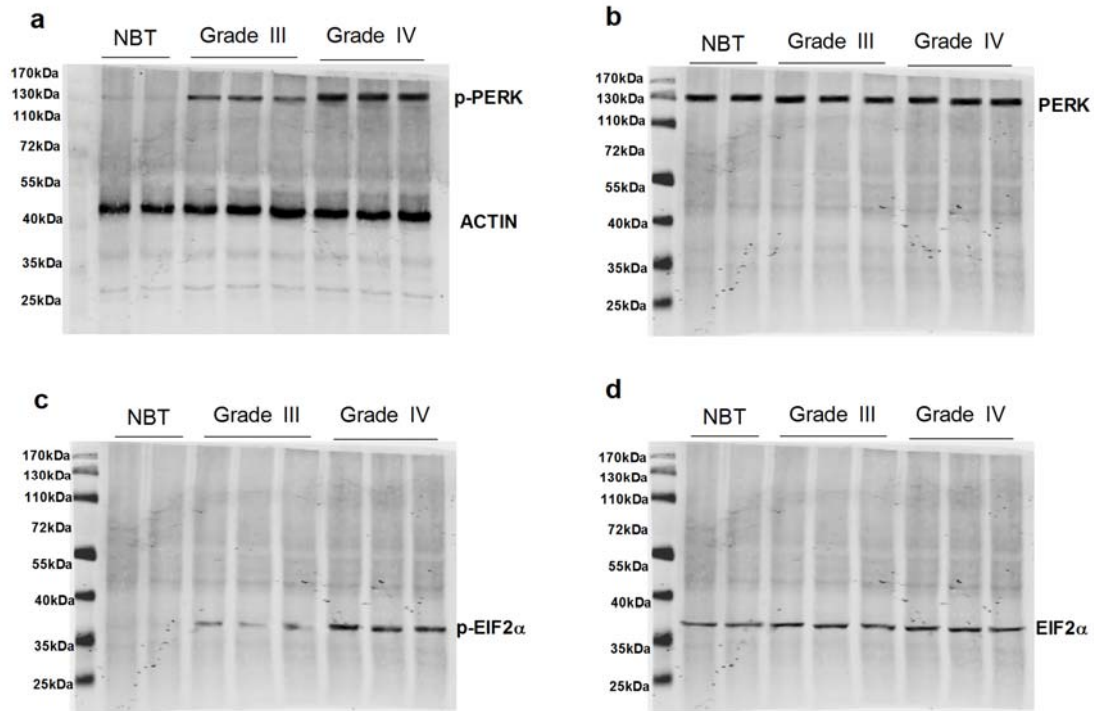

**Supplementary figure 1 - PERK is strongly activated in glioma tissues.** Westernblot analyses of p-PERK, PERK, p-EIF2 $\alpha$  and EIF2 $\alpha$  protein expression in different grades of gliomas and nontumor brain tissues (NBT) with the full size panels for immunoblot.

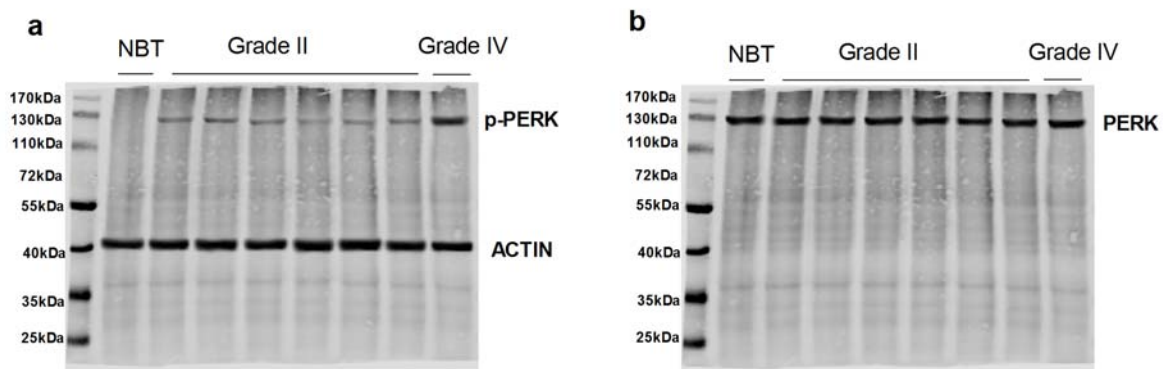

**Supplementary figure 2 - PERK is differentially activated in Grade II glioma tissues.** Westernblot analyses of p-PERK, PERK, p-EIF2 $\alpha$  and EIF2 $\alpha$  protein expression in nontumor brain tissue (NBT) sample, 6 Grade II glioma samples and Grade IV grade glioma sample with the full size panels for immunoblot.
